# Supplementary material for: Neuroimmune Pathophysiology in Asthma
Source: PubMed Central journal article supplement (PMC8155297; doi:10.3389/fcell.2021.663535), 2021-05-13
Supplement: Table_1.pdf [file Table_1.pdf]

**Supplementary table 1. Summary of main effects of neurotransmitters/neuropeptides and their experimental drugs in asthma.**

| <b>Molecule</b>     | <b>Mechanisms</b>                                                                                                | <b>Receptor (s) related to this effect</b> | <b>Experimental model</b>                    |
|---------------------|------------------------------------------------------------------------------------------------------------------|--------------------------------------------|----------------------------------------------|
| <b>ACh</b>          | Bronchoconstriction and ASM hypertrophy.                                                                         | M1, M3                                     | Human (1520495), MMAA (24156289)             |
|                     | Mucus hypersecretion and MUC5AC synthesis.                                                                       | M3.                                        | Human (11802783)                             |
|                     | Fibroblast's collagen synthesis and alveolar wall thickness.                                                     | M2, M3                                     | Human (16902194, 18480105)                   |
|                     | Production of IL-6,IL-8,and LTB4.                                                                                | M2, M3                                     | Human (21885397)                             |
|                     | Th2 profile synthesis.                                                                                           | M3                                         | MMA (22727154)                               |
|                     | Reduces TNF- $\alpha$ , IL-6, and IL-1 synthesis in macrophages and neutrophils; in ILC2 reduces IL-5 and IL-13. | $\alpha 7nAChR$                            | Human and MM (21911260; 27752043)            |
| Metacholine         | Nonselective muscarinic agonist. Useful for AHR diagnosis in asthma in the metacholine challenge.                | Nonselective muscarinic agonist            | Human and MMA (31613496; 32791506, 30097294) |
| Tiotropium bromide  | Decreases ASM thickening, peribronchial collagen deposition, inflammatory cells and Th2 cytokines.               | M3 selective antagonist                    | MMA (22727154)                               |
| Acclidinium bromide | Inhibits fibroblast development and collagen synthesis.                                                          | M1, M2, M3 selective antagonist            | Human (23018909)                             |
| <b>SP</b>           | Neutrophil chemotaxis.                                                                                           | NK1R                                       | MMA (17494633)                               |

|                                   |                                                                                                                                             |                            |                                                       |
|-----------------------------------|---------------------------------------------------------------------------------------------------------------------------------------------|----------------------------|-------------------------------------------------------|
|                                   | CCL4, CCL5, and IL-8 synthesis.                                                                                                             |                            | MM (28366881)                                         |
|                                   | Basophil and eosinophil migration.                                                                                                          |                            | Human (20035805)                                      |
|                                   | T-cell proliferation and IL-2 synthesis.                                                                                                    |                            | MMA (32160549)                                        |
|                                   | IL-1, GM-CSF and LTB4 synthesis by MCs.                                                                                                     |                            | Human (17922833)                                      |
|                                   | DCs survival.                                                                                                                               |                            | MMA (23049899)                                        |
|                                   | Increase of intracellular calcium in ASM cells                                                                                              |                            | MMA (19541629; 30946859)                              |
| [D-Arg1, D-Phe5, D-Trp7,9, Leu11] | Decreases basophil chemotaxis.                                                                                                              |                            | Human (20035805)                                      |
| WIN62577                          | Diminishes IL-13-induced ASM proliferation and increases <i>SERCA</i> expression, reducing intracellular calcium available for contraction. | NK1R selective antagonists | MMA (21777465)                                        |
| GR203040                          | ASM relaxation and decreased NCX expression.                                                                                                |                            | MMA (30946859)                                        |
| CP96345                           | Reduces TGF- $\beta$ levels favoring relaxation and less fibrosis.                                                                          |                            | Human bronquial epithelial cells (BEAS-2B) (19279355) |
| <b>NKA</b>                        | Bronchoconstriction.                                                                                                                        |                            | NK2R                                                  |
| <b>NKB</b>                        |                                                                                                                                             | NK3R                       | Human (10780997)                                      |
| <b>HK-1</b>                       |                                                                                                                                             | NK1R                       | Human and MM (20929541,33398613,                      |

|                           |                                                                                                                           |                                 |                         |
|---------------------------|---------------------------------------------------------------------------------------------------------------------------|---------------------------------|-------------------------|
|                           |                                                                                                                           |                                 | 33239234)               |
| <b>EKA/EKB</b>            |                                                                                                                           | NK1R                            | Human and MM (20929541) |
| [MePhe <sup>7</sup> -NKB] | Increases AHR.                                                                                                            | NKB                             | MM (22536826)           |
| CS-003                    | Diminishes bronchoconstriction after metacholine challenge.                                                               | Triple antagonist for NK1R-NK3R | Human (16364669)        |
| MEN-10376                 | Reduces lung insuflation pressure.                                                                                        | NK2R selective antagonist       | MM (12656947)           |
| SR48968                   | Decreases HK-1-induced bronchoconstriction.                                                                               | NK2R selective antagonist       | Human and MM (20929541) |
| SR140333                  | Synergic effect with SR48968.                                                                                             | NK1R selective antagonist       | Human and MM (20929541) |
| SB223412                  | Diminish NKB-induced AHR.                                                                                                 | NK3R selective antagonists      | MM (22536826)           |
| SR142801                  |                                                                                                                           |                                 |                         |
| <b>CGRP</b>               | Modulates Th9 response by increasing GATA3 and PU.1 expression with the subsequent IL-9 synthesis and airway inflammation | RAMP-1                          | Human (9620797)         |
|                           | In ILC2 cells, enhances their maturation by increasing IL-5 levels.                                                       |                                 | MMA (29599193)          |
|                           | Recruits eosinophils and augments Th2 profile.                                                                            |                                 | MMA (29599193)          |
|                           | Increases histamine-induced edema.                                                                                        |                                 | Rabbits (2416378)       |

|                                               |                                                                                                                  |                                              |                          |
|-----------------------------------------------|------------------------------------------------------------------------------------------------------------------|----------------------------------------------|--------------------------|
|                                               | Diminishes maturation and antigen-presenting capacity of DCs, eosinophil count and IL-10 in BALF; augments Treg. |                                              | MMAA (21755211)          |
| Exogenous $\alpha$ -CGRP                      | Reduces AHR and airway inflammation.                                                                             |                                              | MM (11956058)            |
| <b>5-HT</b>                                   | In DCs mature, modulates production of IL-1 $\beta$ and IL-8                                                     | 5-HTR <sub>3/4/7</sub>                       | Human (15128784)         |
|                                               | Expression of a Th2 profile in pulmonary DCs                                                                     | 5-HTR                                        | MMA (19649285)           |
|                                               | Indirectly induces bronchoconstriction by releasing ACh.                                                         | 5-HTR <sub>2A/3</sub>                        | MMA (12429569, 20347047) |
| <b>GABA</b>                                   | ASM relaxation.                                                                                                  | GABA <sub>A</sub> R ( $\alpha$ 4,5 subunits) | Human and MM (21949156)  |
|                                               | In macrophages, reduces IL-6 and IL-12 synthesis.                                                                | GABA <sub>A</sub> R (subunit $\alpha$ 1)     | MM (17599468)            |
|                                               | Decreases T-cell proliferation.                                                                                  | GABA <sub>A</sub> R                          | Human (21093461)         |
|                                               | ASM relaxation.                                                                                                  | GABA <sub>A</sub> R ( $\alpha$ 4,5 subunits) | Human and MM (21949156)  |
| GABA $\alpha$ 5 $\beta$ 3 $\gamma$ 2          | ASM relaxation and synergic effect with <i>Phenolic GABA</i> $\alpha$ 4 $\beta$ 3 $\gamma$ 2.                    | GABAR non-selective agonist                  | MMAA (28440659)          |
| Phenolic GABA $\alpha$ 4 $\beta$ 3 $\gamma$ 2 | ASM relaxation and synergic effect with <i>GABA</i> $\alpha$ 5 $\beta$ 3 $\gamma$ 2.                             | GABAR non-selective agonist                  | MMAA (28440659)          |
| MIDD0301                                      | ASM relaxation.                                                                                                  | GABA <sub>A</sub> R agonist                  | MMA (30489155)           |

|                                   |                                                                                                                        |                  |                           |
|-----------------------------------|------------------------------------------------------------------------------------------------------------------------|------------------|---------------------------|
| <b>VIP</b>                        | Decreases neutrophil recruitment caused by IL-1 $\beta$ .                                                              | VPAC1            | MMA (14700751)            |
|                                   | Augments mRNA e-cadherin expression for injury healing.                                                                |                  | Human (19695837)          |
|                                   | Reduces monocyte chemotaxis by decreasing IL-8 synthesis.                                                              |                  | Human (12589787)          |
|                                   | Potent bronchodilator against AHR induced by histamine.                                                                | VPAC2            | Human (3781947; 11683518) |
| Exogenous VIP                     | Less bronchial wall thickness, cilia detachment, inflammatory cell infiltration, and IL-13-induced ASM proliferation.  | VPAC1 agonists   | MMAA (29408536)           |
| Exogenous VIP + $\alpha$ -Alumina | Reduce AHR, BALF-eosinophilia, mucus hypersecretion, goblet cell hyperplasia, IgE, IL-1, IL-5, IL-6, and IL-13 levels. |                  | MMAA (27771365)           |
| Ro 25-1553                        | Broncodilation in moderate asthma.                                                                                     |                  | Human (12612296)          |
| PD80059                           | Effects contrary to exogenous VIP by decreasing <i>ERK1/2</i> expression.                                              | VPAC1 antagonist | MMA (29408536)            |
| <b>N/OFG</b>                      | Modulates T-cell activation in vitro and reduces TCD4+, IL-4, and IL-13.                                               | NOP receptor     | MMA (15020071)            |
|                                   | Reduces AHR induced by ACh                                                                                             |                  | Human and MMA (23502511)  |
| Exogenous N/OFG                   | Decreases eosinophil recruitment and activation, peribronchial inflammatory infiltrate, IL-8, CCL11, and CCL26.        |                  |                           |

|            |                                                                                                                          |                          |                  |
|------------|--------------------------------------------------------------------------------------------------------------------------|--------------------------|------------------|
| UFP-112    | Diminishes eosinophilic infiltrate, T-cell proliferation, and Th2; augments IFN- $\gamma$ levels.                        | NOP receptor agonist     | MMAA (23502511)  |
| UFP-101    | Blocks the effect of UFP-112                                                                                             | NOP receptor antagonist  | MMAA (23502511)  |
| J11397     | Counteracts the effect of N/OFG in AHR induced by ACh.                                                                   | NOP receptor antagonist  | MM (12940371)    |
| <b>NPY</b> | Favors their adhesion and oxidative burst of macrophages.                                                                | Y1R                      | MM (11438170)    |
|            | Enhances DCs migration in addition to CCL3, inhibits their IL-12 and IFN- $\gamma$ synthesis, and promotes Th2 response. |                          | Human (24699455) |
|            | Augments eosinophil counts, CD11c+ and Th2 cytokines.                                                                    |                          | MMAA (21383768)  |
| BIBO-3304  | Blocks NPY effects on eosinophils, CD11c+ and Th2 profile.                                                               | Y1R selective antagonist | MMAA (30604629)  |

ACh= Acetylcholine, AHR=Airway hyperresponsiveness, ASM=Airway smooth muscle, BALF=Bronchoalveolar lavage fluid, CCL=Chemokines, CGRP=Calcitonin Gene-Related Peptide, DCs=Dendritic cells, EKA/EKB =Endokinins A/B, GABA=Gamma-aminobutyric acid, GM-CSF=Granulocyte-macrophage colony-stimulating factor, HK-1= Hemokinin 1, IL=Interleukins, ILC2=Innate lymphoid cell type 2, MCs=Mast cells, MM= Murine model, MMA= Murine model of asthma, MMAA= Murine model of allergic asthma, MUC5AC=Mucin 5AC, M1-3=muscarinic receptors 1-3, NKA=Neurokinin A, NKB=Neurokinin B, NK1R-3R=Neurokinin receptors 1-3, NPY=Neuropeptide Y, N/OFG=Nociceptin/orphanin FQ, RAMP-1=Receptor Activity-Modifying Protein 1, SP= Substance P, TGF- $\beta$ =Transforming growth factor-beta, TNF- $\alpha$ =Tumor Necrosis Factor-alpha, VIP=Vasoactive intestinal polypeptide, VPAC1=VIP receptor 1. (#####) = PubMed ID.
